# Supplementary material
Source: Springer Nature journal article supplement (https://www.springermedizin.de/resource/supplementary/12885_2014_5100_MOESM3_ESM.pdf/9468414)
Supplement: MOESM3 [file 9468414]

**A**

Triple positive

Triple negative

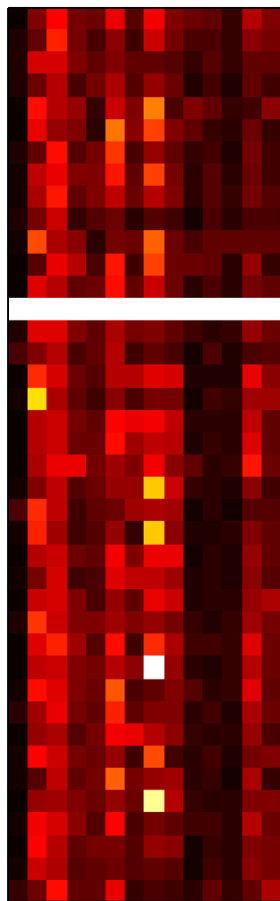

Glucose  
Lactate  
Gln/Glu  
Glycine  
Myo-Ino  
Taurine  
GPC  
PC  
Cho  
Creatine  
Glutamine  
Succinate  
Glutamate  
Alanine

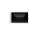**TNBC**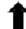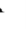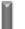**B**

ER positive

ER negative

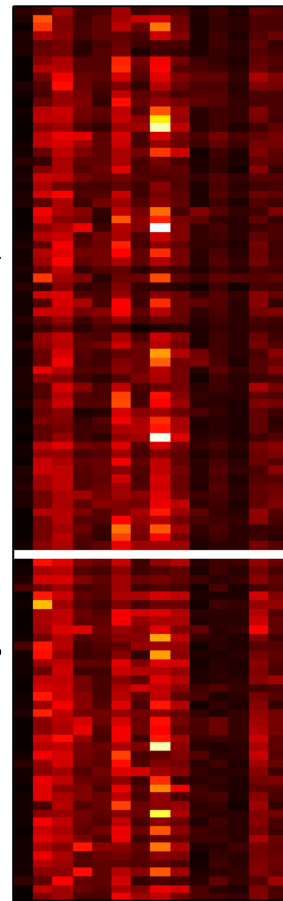

Glucose  
Lactate  
Gln/Glu  
Glycine  
Myo-Ino  
Taurine  
GPC  
PC  
Cho  
Creatine  
Glutamine  
Succinate  
Glutamate  
Alanine

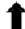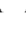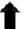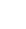**ER negative****C**

HER-2 positive

HER-2 negative

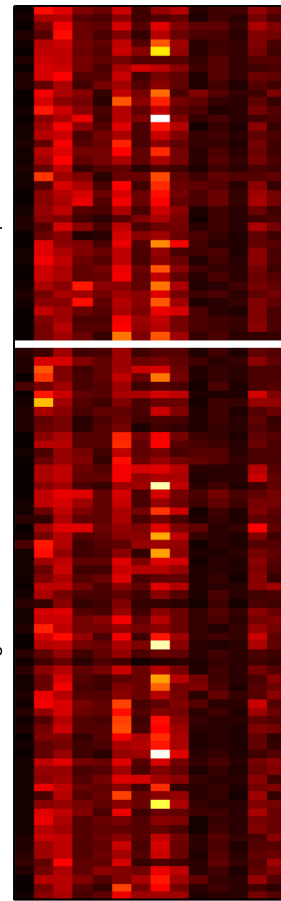

Glucose  
Lactate  
Gln/Glu  
Glycine  
Myo-Ino  
Taurine  
GPC  
PC  
Cho  
Creatine  
Glutamine  
Succinate  
Glutamate  
Alanine

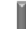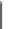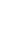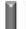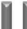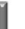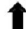**HER negative**
